# Supplementary material for: Flame-retardant effect of tannic acid-based intumescent fire-retardant applied on flammable natural rubber
Source: Royal Society of Chemistry journal article supplement (doi:10.1039/d2ra04682b), 2022-01-01
Supplement: d2ra04682b1.pdf [file d2ra04682b1.pdf]

**Flame-retardant effect of tannic acid-based intumescent fire-retardant applied  
on flammable natural rubber**

Jingchao Wang<sup>a,§</sup>, Xue ya Wang<sup>a,§</sup>, Zi wen Zhou<sup>a</sup>, Xiaoyang Liu<sup>b</sup>, Meiming Xu<sup>b</sup>, Fa  
Zhao<sup>c</sup>, Feng Zhao<sup>a</sup>, Song Li<sup>a</sup>, Zhihua Liu<sup>a</sup>, Lin Li<sup>a\*</sup>, Shuai Zhao<sup>a,\*</sup>

<sup>a</sup> Key Lab of Rubber-plastics, Ministry of Education/Shandong Provincial Key Lab of  
Rubber-plastics, School of Polymer Science and Engineering, Qingdao University of  
Science and Technology, Qingdao, 266042, China.

<sup>b</sup> Shandong Rike Chemical Co., Ltd, Changle, 262499, China.

<sup>c</sup> Qingdao Haier Refrigerator Co., Ltd.

<sup>§</sup>The authors contribute equally to this work.

**\*Corresponding author E-mail address: qustlilin@hotmail.com(L. Li) and  
lyzhsh@163.com (S. Zhao).**

Table S1 The batch compositions for ACT system.

| Fire retardant | APP<br>(g) | TC<br>(g)   |           |
|----------------|------------|-------------|-----------|
|                |            | Clay<br>(g) | TA<br>(g) |
| APP20          | 20         | --          | --        |
| APP40          | 40         | --          | --        |
| APP60          | 60         | --          | --        |
| ACT20          | 14.5       | 3.67        | 1.83      |
| ACT40          | 29.1       | 7.27        | 3.63      |
| ACT60          | 43.6       | 10.93       | 5.47      |

Table S2 TGA and DTG data of flame retardant APP and AGT under N<sub>2</sub> atmosphere.

| Sample | T <sub>-5%</sub><br>(°C) | T <sub>max</sub> (°C)  |                        |                        | Residue at<br>800 °C (%) |
|--------|--------------------------|------------------------|------------------------|------------------------|--------------------------|
|        |                          | T <sub>1max</sub> (°C) | T <sub>2max</sub> (°C) | T <sub>3max</sub> (°C) |                          |
| APP    | 308.2                    | 345.6                  | 479.6                  | 565.0                  | 46.14                    |
| ACT    | 315.8                    | 386.3                  | -                      | -                      | 50.55                    |

Table S3 SE value of flame retardant APP and ACT systems.

| <b>Samples</b> | <b>NR<br/>(phr)</b> | <b>APP<br/>(phr)</b> | <b>TC (phr)</b>       |                     | <b>LOI<br/>(%)</b> | <b>SE</b> |
|----------------|---------------------|----------------------|-----------------------|---------------------|--------------------|-----------|
|                |                     |                      | <b>Clay<br/>(phr)</b> | <b>TA<br/>(phr)</b> |                    |           |
| Neat NR        | 100                 | --                   | --                    | --                  | 19.1               | -         |
| NR/APP14.5     | 100                 | 14.5                 | --                    | --                  | 20.0               | 1.08      |
| NR/TC5.5       | 100                 | --                   | 3.67                  | 1.83                | 19.5               |           |
| NR/ACT20       | 100                 | 14.5                 | 3.67                  | 1.83                | 20.5               |           |
| NR/APP29.1     | 100                 | 29.1                 | --                    | --                  | 23.0               | 1.84      |
| NR/TC10.9      | 100                 | --                   | 7.27                  | 3.63                | 20.3               |           |
| NR/ACT40       | 100                 | 29.1                 | 7.27                  | 3.63                | 28.5               |           |
| NR/APP43.6     | 100                 | 43.6                 | --                    | --                  | 25.1               | 1.44      |
| NR/TC15.4      | 100                 | --                   | 10.93                 | 5.47                | 21.0               |           |
| NR/ACT60       | 100                 | 43.6                 | 10.93                 | 5.47                | 30.5               |           |
